# Supplementary material for: Salmonella Typhi infective endocarditis combined with multiorgan infection in an elderly woman-A case report and literature review
Source: Research Square preprint supplement (doi:10.21203/rs.3.rs-6793263/v1), 2025-06-16
Supplement: Supplementary file 1 [file 165a27b90a3ca126ac49c603.docx]

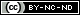

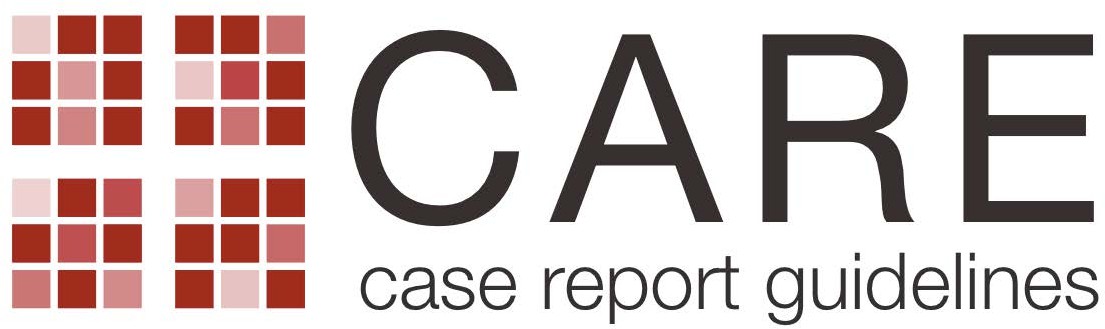
CARE Checklist of information to include when writing a case report

**Topic Item Checklist item description Reported on Line**

**Title 1** The diagnosis or intervention of primary focus followed by the words “case report” **1**

**Key Words 2** 2 to 5 key words that identify diagnoses or interventions in this case report, including "case report" **23**

**Abstract**

**(no references)**

**3a** Introduction: What is unique about this case and what does it add to the scientific literature? **21-22**

3b Main symptoms and/or important clinical findings **17-19**

3c The main diagnoses, therapeutic interventions, and outcomes **19-20**

3d Conclusion—What is the main “take-away” lesson(s) from this case?  **20-21**

Introduction 4 One or two paragraphs summarizing why this case is unique (may include references) **26-55**

Patient Information 5a De-identified patient specific information **28**

5b Primary concerns and symptoms of the patient **28-50**

5c Medical, family, and psycho-social history including relevant genetic information **34**

5d Relevant past interventions with outcomes **NA**

Clinical Findings

Timeline

Diagnostic Assessment

Therapeutic Intervention

Follow-up and Outcomes

1. Describe significant physical examination (PE) and important clinical findings  **41-44**
2. Historical and current information from this episode of care organized as a timeline  **figure 1**

8a Diagnostic testing (such as PE, laboratory testing, imaging, surveys) **41-42**

8b Diagnostic challenges (such as access to testing, financial, or cultural)  **46-50**

8c Diagnosis (including other diagnoses considered) **41-50**

8d Prognosis (such as staging in oncology) where applicable  **52-55**

9a Types of therapeutic intervention (such as pharmacologic, surgical, preventive, self-care)  **pharmacologic**

9b Administration of therapeutic intervention (such as dosage, strength, duration) **43-50**

9c Changes in therapeutic intervention (with rationale) **NA**

10a Clinician and patient-assessed outcomes (if available) **NA**

10b Important follow-up diagnostic and other test results **52-55**

10c Intervention adherence and tolerability (How was this assessed?) 52-55

**10d** Adverse and unanticipated events  **NA**

**Discussion 11a** A scientific discussion of the strengths AND limitations associated with this case report **113-115**

**11b** Discussion of the relevant medical literature **with references table 1**

**11c** The scientific rationale for any conclusions (including assessment of possible causes) **NA**

**11d** The primary “take-away” lessons of this case report (without references) in a one paragraph conclusion  **113-116**

**Patient Perspective 12** The patient should share their perspective in one to two paragraphs on the treatment(s) they received **55**

**Informed Consent 13** Did the patient give informed consent? Please provide if requested **Yes**  **No
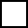
**
